# Supplementary material
Source: Springer Nature journal article supplement (https://www.springermedizin.de/resource/supplementary/12889_2011_3917_MOESM2_ESM.pdf/9491040)
Supplement: MOESM2 [file 9491040]

**Original cohort**  
**n=34,393**

```
graph TD; A["Original cohort  
n=34,393"] --> B["CVD (ICD10) death:  
n=1,077"]; A --> C["n=30,500 alive  
2,816 death for other causes or loss-  
to-follow-up"]; B --> D["Deaths between 1991-2006 and contact  
information available:  
n=404"]; C --> E["Potential controls:  
n=680"]; D --> F["Interviewed  
cases:  
n=98"]; E --> G["Interviewed  
controls:  
n=250"];
```

**CVD (ICD10) death:**  
**n=1,077**

**n=30,500 alive**  
**2,816 death for other causes or loss-**  
**to-follow-up**

**Deaths between 1991-2006 and contact**  
**information available:**  
**n=404**

**Potential controls:**  
**n=680**

**Interviewed**  
**cases:**  
**n=98**

**Interviewed**  
**controls:**  
**n=250**
